# Supplementary material for: Effect of Subinhibitory Concentrations of Antibiotics and Disinfectants on ISAba-Mediated Inactivation of Lipooligosaccharide Biosynthesis Genes in Acinetobacter baumannii
Source: MDPI journal article supplement (doi:10.3390/antibiotics10101259), 2021-10-16
Supplement: s1 [file s1]

Brief Report

# Effect of Subinhibitory Concentrations of Antibiotics and Disinfectants on IS*Aba*-Mediated Inactivation of Lipooligosaccharide Biosynthesis Genes in *Acinetobacter baumannii*

Héctor Olmeda-López, Andrés Corral-Lugo <sup>†</sup> and Michael J. McConnell <sup>\*,†</sup>

Intrahospital Infections Laboratory, National Centre for Microbiology, Instituto de Salud Carlos III (ISCIII), 28221 Madrid, Spain; hectorolmeda97@gmail.com (H.O.L.); acorral@isci.es (A.C.L.)

\* Correspondence: michael.mcconnell@isci.es; Tel.: +34-918-223-896

† A.C.L. and M.J.M. contributed equally to this work and should be considered co-senior authors.

## Supplementary Materials

**Table S1.** List of primers used in the present work.

| Primer                   | Sequence 5' → 3'             | Target gene      | GenBank ID | Source of reference          |
|--------------------------|------------------------------|------------------|------------|------------------------------|
| <i>lpxA</i> _Fw          | TGAAGCATTAGCTCAA<br>GTTT     | <i>lpxA</i>      | 39519984   | Moffat <i>et. al.</i> , 2010 |
| <i>lpxA</i> _Rev         | GTCAGCAAATCAATA<br>CAAGA     |                  |            |                              |
| <i>lpxC</i> _Fw          | TGGTGAAAATCAGGC<br>AATGA     | <i>lpxC</i>      | 31349665   | Moffat <i>et. al.</i> , 2010 |
| <i>lpxC</i> _Rev         | TGAAGATGACGTTCTT<br>GCAA     |                  |            |                              |
| <i>lpxD</i> _Fw          | CAAAGTATGAATACA<br>ACTTTTGAG | <i>lpxD</i>      | 39520015   | Moffat <i>et. al.</i> , 2010 |
| <i>lpxD</i> _Rev         | TCTGCACCAGCAAAC<br>AGGAA     |                  |            |                              |
| IS <i>Aba</i> 11_Fw_Seq  | CCGGGTGATTAAACA<br>GGTTTGT   | IS <i>Aba</i> 11 | JF309050   | This work                    |
| IS <i>Aba</i> 11_Rev_Seq | TCGTGCGGTGTGTAGT<br>CTTC     |                  |            |                              |
